1 **NAIP–NLRC4-deficient mice are susceptible to shigellosis**

2

3 Patrick S. Mitchell<sup>1\*</sup>, Justin L. Roncaioli<sup>1\*</sup>, Elizabeth A. Turcotte<sup>1</sup>, Lisa Goers<sup>2,3,4</sup>, Roberto A. Chavez<sup>1</sup>,  
4 Angus Y. Lee<sup>5</sup>, Cammie F. Lesser<sup>2,3,4</sup>, Isabella Rauch<sup>6</sup>, Russell E. Vance<sup>1,5,7,8</sup>

5

6 <sup>1</sup> Division of Immunology & Pathogenesis, Department of Molecular & Cell Biology, University of  
7 California, Berkeley, USA.

8 <sup>2</sup> Department of Microbiology, Harvard Medical School, Boston, MA, USA.

9 <sup>3</sup> Broad Institute of Harvard and MIT, Cambridge, MA, USA.

10 <sup>4</sup> Department of Medicine, Division of Infectious Diseases, Massachusetts General Hospital, Boston,  
11 MA, USA.

12 <sup>5</sup> Cancer Research Laboratory, University of California, Berkeley, CA USA.

13 <sup>6</sup> Department of Molecular Microbiology and Immunology, Oregon Health and Sciences University,  
14 Portland, OR, USA.

15 <sup>7</sup> Immunotherapeutics and Vaccine Research Initiative, University of California, Berkeley, USA.

16 <sup>8</sup> Howard Hughes Medical Institute, University of California, Berkeley, USA.

17 \* contributed equally

18

19 Correspondence: [rvance@berkeley.edu](mailto:rvance@berkeley.edu)

## 20 Abstract

21 Bacteria of the genus *Shigella* cause shigellosis, a severe gastrointestinal disease that is a major  
22 cause of diarrhea-associated mortality in humans. Shigellosis develops upon oral ingestion of as few  
23 as 100 bacteria, but million-fold higher doses fail to cause disease in mice. The lack of a  
24 physiologically relevant mouse model of shigellosis has impeded our understanding of this important  
25 human disease, but why mice are resistant is unknown. Here we show that in human cells, but not in  
26 mice, *Shigella* evades detection by the NAIP–NLRC4 inflammasome, an immune sensor present in  
27 intestinal epithelial cells (IECs). We find that NAIP–NLRC4-deficient mice are highly susceptible to  
28 oral *Shigella* infection and recapitulate the clinical features of human shigellosis, including bacterial  
29 replication in IECs and neutrophilic inflammation of the colon. Confirming a role for bacterial  
30 replication in IECs in our new model, a *Shigella* mutant lacking *IcsA*, a factor required for cell-to-cell  
31 spread among IECs, is attenuated in otherwise susceptible NAIP–NLRC4-deficient mice. Although  
32 inflammasome-mediated cell death is widely held to promote *Shigella* infection and pathogenesis, we  
33 instead demonstrate that IEC-specific NAIP–NLRC4-induced cell death is sufficient to protect the host  
34 from shigellosis. Thus, NAIP–NLRC4-deficient mice are a physiologically relevant and experimentally  
35 tractable model for shigellosis. More broadly, our results suggest that the lack of an inflammasome  
36 response in IECs may help explain the extreme susceptibility of humans to shigellosis.

37

## 38 Introduction

39 *Shigella* is a genus of Gram-negative enterobacteriaceae that causes ~269 million infections and  
40 ~200,000 deaths annually, a quarter of which are of children under the age of five (Khalil et al., 2018).  
41 Disease symptoms include fever, abdominal cramping, and inflammatory diarrhea characterized by  
42 the presence of neutrophils and, in severe cases, blood (Kotloff et al., 2018). There is no approved  
43 vaccine for *Shigella* and antibiotic resistance continues to rise (Ranjbar and Farahani, 2019). *Shigella*  
44 pathogenesis is believed to be driven by bacterial invasion, replication, and spread within colonic  
45 IECs. *Shigella* virulence requires a plasmid-encoded type III secretion system (T3SS) that injects ~30  
46 effectors into host cells (Schnupf and Sansonetti, 2019; Schroeder and Hilbi, 2008). The virulence  
47 plasmid also encodes *IcsA*, a bacterial surface protein that nucleates host actin at the bacterial pole to  
48 propel the pathogen through the host cell cytosol and into adjacent epithelial cells (Bernardini et al.,  
49 1989; Goldberg and Theriot, 1995).

50 A major impediment to studying *Shigella* is the lack of experimentally tractable *in vivo* models  
51 that accurately recapitulate human disease after oral inoculation. Although the infectious dose for  
52 humans is as low as 10-100 bacteria (DuPont et al., 1969; DuPont et al., 1989), mice are resistant to  
53 high doses of oral *Shigella* challenge (Freter, 1956; McGuire and Floyd, 1958). Rabbits, guinea pigs,  
54 zebrafish, piglets, and macaques have been used as models (Islam et al., 2014; Jeong et al., 2010;  
55 Mostowy et al., 2013; Ranallo et al., 2014; Shim et al., 2007; West et al., 2005; Yum and Agaisse,  
56 2019; Yum et al., 2019) but the cost and/or limited tools in these systems impair detailed studies of  
57 pathogenesis. Oral streptomycin administration and other treatments facilitate *Shigella* colonization of  
58 the mouse intestinal lumen by ablating the natural colonization resistance provided by the microbiome  
59 (Freter, 1956; Martino et al., 2005; Medeiros et al., 2019). However, antibiotic-treated mice do not  
60 present with key hallmarks of human disease, likely due to the failure of *Shigella* to invade and/or  
61 establish a replicative niche within the mouse intestinal epithelium.

62 Inflammasomes are cytosolic multi-protein complexes that initiate innate immune responses  
63 upon pathogen detection or cellular stress (Lamkanfi and Dixit, 2014; Rathinam and Fitzgerald, 2016).  
64 The NAIP–NLRC4 inflammasome is activated when bacterial proteins, such as flagellin or the rod and  
65 needle proteins of the T3SS apparatus, are bound by NAIP family members. Importantly, the *Shigella*  
66 T3SS inner rod (MxiI) and needle (MxiH) proteins are both potent agonists of human and mouse  
67 NAIPs (Reyes Ruiz et al., 2017; Yang et al., 2013). Activated NAIPs then co-assemble with NLRC4 to  
68 recruit and activate the Caspase-1 (CASP1) protease (Vance, 2015; Zhao and Shao, 2015). CASP1  
69 then cleaves and activates the pro-inflammatory cytokines IL-1 $\beta$  and IL-18 and the pore-forming  
70 protein Gasdermin-D (Kayagaki et al., 2015; Shi et al., 2015), initiating a lytic form of cell death called  
71 pyroptosis. We and others recently demonstrated that activation of NAIP–NLRC4 in IECs further  
72 mediates the cell-intrinsic expulsion of infected epithelial cells from the intestinal monolayer (Rauch et

73 al., 2017; Sellin et al., 2014). In the context of *Shigella* infection, it is generally accepted that  
74 inflammasome-mediated pyroptosis of infected macrophages promotes pathogenesis by initiating  
75 inflammation, and by releasing bacteria from macrophages, allowing the bacteria to invade the  
76 basolateral side of intestinal epithelial cells (Ashida et al., 2014; Lamkanfi and Dixit, 2010; Schnupf  
77 and Sansonetti, 2019). However, it has not been possible to test the role of inflammasomes in the  
78 intestine after oral *Shigella* infection due to the lack of a genetically tractable model. Here we develop  
79 the first oral infection mouse model for *Shigella* infection and demonstrate a specific host-protective  
80 function for inflammasomes in intestinal epithelial cells.

81

## 82 **Results**

### 83 ***Shigella* suppresses the human NAIP–NLRC4 inflammasome**

84 The *Shigella* T3SS effector OspC3 inhibits cytosolic LPS sensing by the human Caspase-4 (CASP4)  
85 inflammasome, but does not bind to the mouse ortholog, Caspase-11 (CASP11) (Kobayashi et al.,  
86 2013). We reasoned that inflammasome inhibition may be a general strategy used by *Shigella* to  
87 establish infection, and that such inhibition might occur in a host-specific manner. To test this  
88 hypothesis, we compared inflammasome-dependent cell death following *Shigella* infection of mouse  
89 C57BL/6 (B6) bone marrow-derived macrophages (BMMs) and human PMA-differentiated THP1 cells.  
90 Infection with the wild-type (WT) *Shigella flexneri* strain 2457T but not the avirulent BS103 strain  
91 (which lacks the virulence plasmid) resulted in CASP1-dependent cell death in both mouse  
92 (Sandstrom et al., 2019) and human cells (**Figure 1A,B**). Cell death was negligible in *Shigella*-  
93 infected mouse *Nlrc4*<sup>-/-</sup> BMMs (**Figure 1A**). In contrast, *Shigella* infection induced similar levels of cell  
94 death in WT and *NLRC4*<sup>-/-</sup> THP1 cells, indicating that NLRC4 is not a major contributor to *Shigella*-  
95 induced CASP1 activation in human cells (**Figure 1B**).

96 To confirm prior reports (Yang et al., 2013) that the *Shigella* T3SS MxiH (needle) protein is a  
97 potent agonist of the human NAIP–NLRC4 inflammasome, and that THP1 cells express a functional  
98 NAIP–NLRC4 inflammasome (Kortmann et al., 2015; Reyes Ruiz et al., 2017), we produced  
99 recombinant LFn-MxiH for cytosolic delivery to cells via the protective antigen (PA) channel, as  
100 previously described (Rauch et al., 2017; Rauch et al., 2016; von Moltke et al., 2012). Treatment of  
101 THP1 cells with LFn-MxiH+PA (“NeedleTox”), but not PA alone, induced a CASP1- and NLRC4-  
102 dependent cell death (**Figure 1C**). We also confirmed that *Shigella* MxiH and MxiI (rod) activate  
103 human NAIP–NLRC4 in a reconstituted inflammasome assay (Reyes Ruiz et al., 2017; Tenthorey et  
104 al., 2014) (**Figure 1D**). These results confirm that the *Shigella* rod and needle proteins are capable of  
105 activating the human NAIP–NLRC4 inflammasome. Moreover, since we observe robust activation of  
106 NAIP–NLRC4 in mouse cells (**Figure 1A**), our data indicate that the *Shigella* T3SS needle and rod  
107 proteins are delivered to the cytosol during infection. However, the presence of other inflammasomes  
108 in THP1 cells obscures our ability to determine if *Shigella* activates human NLRC4.

109 To eliminate cell death induced by the AIM2 and PYRIN inflammasomes, we used THP1  
110 *AIM2*<sup>-/-</sup> cells treated with colchicine, an inhibitor of PYRIN (Gao et al., 2016). Interestingly, WT  
111 *Shigella* infection did not induce pyroptosis of colchicine-treated *AIM2*<sup>-/-</sup> THP1 cells (**Figure 1E**).  
112 Thus, although human THP1 cells express functional NAIP–NLRC4, and *Shigella* rod and needle  
113 proteins can activate NAIP–NLRC4, we nevertheless observe no such activation during *Shigella*  
114 infection. We therefore hypothesized that *Shigella* might antagonize the human NAIP–NLRC4  
115 inflammasome. To test this hypothesis, *AIM2*<sup>-/-</sup> colchicine-treated THP1 cells were either uninfected  
116 or infected with the *Shigella* WT or BS103 strains for one hour, and then treated with NeedleTox to  
117 induce NAIP–NLRC4-dependent cell death. Interestingly, NeedleTox-induced pyroptosis was  
118 significantly reduced in cells previously infected with WT but not avirulent BS103 *Shigella* (**Figure 1E**).  
119 As a control, treatment with nigericin, an agonist of the NLRP3 inflammasome, induced cell death  
120 similarly in cells that were uninfected or infected with either WT or BS103 *Shigella* strains. Thus, WT  
121 *Shigella* infection appears to specifically suppress activation of the human but not the mouse NAIP–  
122 NLRC4 inflammasome. Future studies will be required to address the mechanism of *Shigella*  
123 antagonism of human NAIP–NLRC4, as well as the mechanism of *Shigella* activation of AIM2 and/or  
124 PYRIN.

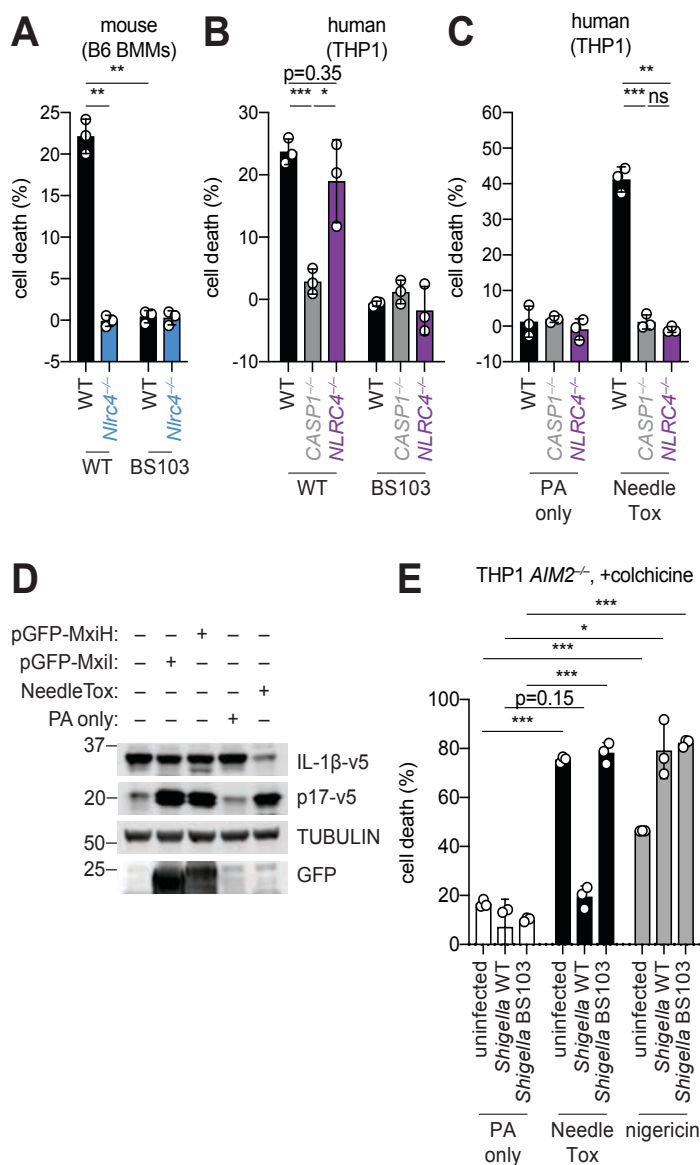

**Figure 1. *Shigella* infection suppresses the NAIP–NLRC4 inflammasome.**

(A) *Shigella* infection (MOI 10) of C57BL/6 WT or *Nlrc4*<sup>-/-</sup> bone marrow derived macrophages (BMMs). Cell death was measured 30 minutes post-infection (after spinfection, invasion, and washes) by propidium iodide uptake and reported as percent death relative to 100% killing by treatment with Triton X-100.

(B) Cell death of *Shigella* infected THP1 WT, *CASP1*<sup>-/-</sup> or *NLRC4*<sup>-/-</sup> cells as in (A). Cell death was measured 30 minutes post-infection.

(C) Cell death of THP1 WT, *CASP1*<sup>-/-</sup> or *NLRC4*<sup>-/-</sup> cells treated with 10μg/mL PA alone or in combination with 10μg/mL LFn-MxiH (“NeedleTox”). Cell death was measured 4 hours post-challenge.

(D) Human NAIP–NLRC4 inflammasome reconstitution in 293T cells. Inflammasome activation was measured by CASP1-dependent processing of pro-IL-1β to p17 by co-transfection of an empty vector, pGFP-MxiH or pGFP-Mxil, or by treatment with 10μg/mL PA alone or in combination with 10μg/mL LFn-MxiH.

(E) Colchicine-treated *AIM2*<sup>-/-</sup> THP1 cells were either left uninfected or infected for 1 hour (after spinfection, invasion, and washes) with WT or BS103 *Shigella* (MOI 10), and then treated with 10μg/mL PA alone, PA + 1.0μg/mL LFn-MxiH (“NeedleTox”), or 10μM nigericin. Cell death was measured by PI staining and is reported as cell death relative to TX-100-treated controls per infection type.

Data are representative of at least three independent experiments. Mean ± SD is shown in (A–C,E), unpaired t-test with Welch’s correction: \**P* < 0.01, \*\**P* < 0.001, \*\*\**P* < 0.0001.

## 127 **B6.Naip-deficient mice are susceptible to shigellosis**

128 The mouse NAIP–NLRC4 and CASP1 inflammasomes protect the intestinal epithelium from  
129 *Salmonella* (Rauch et al., 2017; Sellin et al., 2014). Thus, the above experiments led us to  
130 hypothesize that the failure of *Shigella* to antagonize mouse inflammasomes might explain the  
131 inborne resistance of mice versus humans to *Shigella* infection. A prediction from this hypothesis is  
132 that mice deficient in inflammasomes might be susceptibility to oral *Shigella* challenge.

133 To test this, we first pretreated B6 WT mice orally with streptomycin antibiotic. Consistent with  
134 prior studies (Freter, 1956; Martino et al., 2005; Medeiros et al., 2019), we found that antibiotic pre-  
135 treatment followed by oral infection allows for robust *Shigella* colonization of the intestinal lumen and  
136 feces compared to water-only controls (**Figure S1**). However, these high luminal bacterial loads  
137 ( $>10^8$  CFU/g feces) do not cause overt disease (**Figure 2** and **Figure S2**). To determine if  
138 inflammasomes contribute to the resistance of mice to *Shigella*, we orally challenged WT and  
139 *Casp1/11*<sup>-/-</sup> mice with  $5 \times 10^7$  CFU of *Shigella*. CASP1 has been previously reported to drive acute  
140 inflammation and *Shigella* clearance during mouse lung infection via the processing and release of IL-  
141 1 $\beta$  and IL-18 (Sansone et al., 2000). Mice that lack CASP1 and/or CASP11 are also more  
142 susceptible to oral infection with *Salmonella* Typhimurium (Crowley et al., 2020). In contrast, B6 WT  
143 and *Casp1/11*<sup>-/-</sup> mice were similarly resistant to *Shigella* infection, showing no signs of intestinal  
144 inflammation or disease (**Figure S2A–C**). Thus, neither of the primary caspases associated with the  
145 canonical or non-canonical inflammasome are essential for resistance to *Shigella* in the mouse  
146 intestine.

147 The NAIP–NLRC4 inflammasome can recruit Caspase-8 (CASP8) in the absence of CASP1,  
148 an event which leads to non-lytic cell death and delayed IEC expulsion (Rauch et al., 2017). We  
149 reasoned that this compensatory capacity of CASP8 may account for the resistance of *Casp1/11*<sup>-/-</sup>  
150 mice to *Shigella* infection. Thus, to directly test if the mouse NAIP–NLRC4 inflammasome mediates  
151 resistance to shigellosis, we orally infected streptomycin-pretreated B6 WT and  $\Delta Naip$  mice with  $5 \times 10^7$   
152 CFU of *Shigella*.  $\Delta Naip$  mice (also called *Naip1-6 $\Delta/\Delta$*  mice (Rauch et al., 2016)) harbor a large  
153 chromosomal deletion that eliminates expression of all mouse *Naip* genes. Remarkably, *Shigella*-  
154 infected  $\Delta Naip$  but not WT mice exhibited clear signs of disease (**Figure 2**). At two days post-  
155 challenge,  $\Delta Naip$  mice had altered stool consistency (**Figure 2A**), cecum shrinkage, and thickening of  
156 the cecum and colon tissue (**Figure 2A,B**). Histological analysis of primary sites of infection (cecum,  
157 colon) revealed edema, epithelial hyperplasia, epithelial sloughing, and inflammatory infiltrate  
158 (predominantly neutrophils and mononuclear cells in the submucosa and mucosa) exclusively in  
159  $\Delta Naip$  mice (**Figure 2C,D**). In contrast, we did not observe any indicators of inflammation in  $\Delta Naip$   
160 mice infected with the avirulent BS103 strain (**Figure 2C,D**).

161 A defining feature of human shigellosis is the presence of neutrophils in patient stools (Raqib  
162 et al., 2000). The levels of myeloperoxidase (MPO, a neutrophil marker) were low or undetectable in  
163 the feces of mice following antibiotic treatment (**Figure 2E**), indicating that microbiota disruption did  
164 not itself promote neutrophilic inflammation. Following *Shigella* infection, however, fecal MPO from  
165  $\Delta Naip$  mice dramatically increased (**Figure 2E**). In contrast, MPO levels remained low in both B6 WT  
166 and *Casp1/11*<sup>-/-</sup> mice (**Figure S2D**) or  $\Delta Naip$  mice infected with the avirulent BS103 strain (**Figure**  
167 **2E**). These results indicate that NAIP–NLRC4-deficient mice experience robust neutrophilic infiltrate  
168 consistent with human shigellosis.

## 170 **B6.Nlrc4<sup>-/-</sup> mice are susceptible to shigellosis**

171 To confirm that the NAIP–NLRC4 inflammasome confers resistance to *Shigella*, to account for  
172 potential microbiota-associated phenotypes, and to further characterize the disease phenotype, we  
173 next infected streptomycin-pretreated B6.Nlrc4<sup>+/-</sup> and B6.Nlrc4<sup>-/-</sup> littermates, as well as B6 WT mice  
174 that had been co-housed for three weeks prior to inoculation (Nlrc4<sup>+/-</sup> and B6 WT mice are hereby  
175 referred to collectively as Nlrc4<sup>+</sup>). Consistent with our prior results in  $\Delta Naip$  mice, we observed  
176 thickening of the intestinal mucosa (**Figure 3A**), cecum shrinkage (**Figure 3A,B**), increased fecal  
177 MPO levels (**Figure 3C**), and acute weight loss (**Figure 3D**) in *Shigella*-infected B6.Nlrc4<sup>-/-</sup> mice but  
178 not B6.Nlrc4<sup>+</sup> littermates or co-housed mice. B6.Nlrc4<sup>-/-</sup> mice also had diarrhea, which was apparent

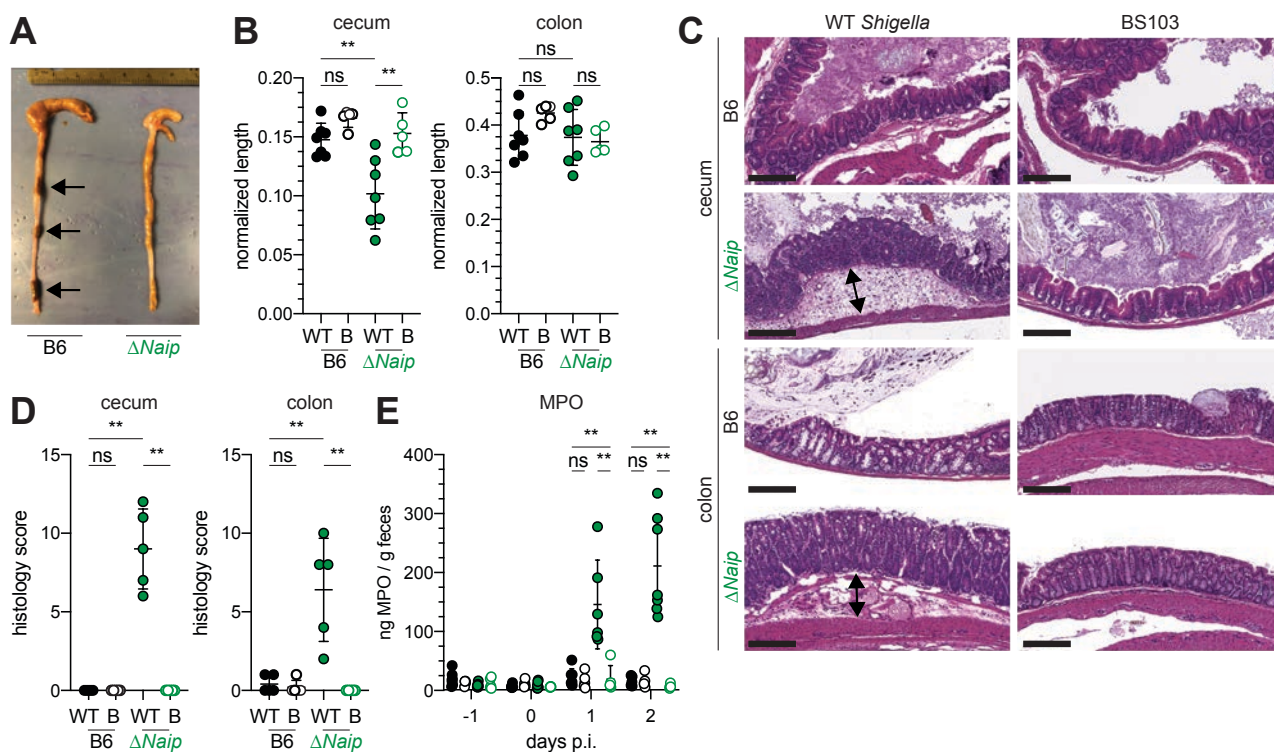

179 by visual inspection of luminal contents and measured by the wet-to-dry ratio of fecal pellets (Figure  
 180 3E). Thus, B6.*Nlrc4*<sup>-/-</sup> mice phenocopy the disease susceptibility of B6.Δ*Naip* mice, and strongly  
 181 suggest that the NAIP–NLRC4 inflammasome mediates the resistance of mice to *Shigella* infection.

182 Surprisingly, despite the clear differences in disease between *Shigella* infected B6.*Nlrc4*<sup>+</sup> and  
 183 B6.*Nlrc4*<sup>-/-</sup> mice, we found no significant difference in the bacterial burdens of cecum or colon tissue  
 184 (Figure 3F). To more directly measure the intracellular colonization of IECs, the primary replicative  
 185 niche for *Shigella*, we enriched IECs from the ceca and colons of infected B6.*Nlrc4*<sup>+</sup> and B6.*Nlrc4*<sup>-/-</sup>  
 186 mice (see Methods). We found an ~20-fold difference in colonization in enriched IECs between  
 187 B6.*Nlrc4*<sup>+</sup> and B6.*Nlrc4*<sup>-/-</sup> mice (Figure 3G), indicating that disease in our model correlates with  
 188 invasion of and replication in IECs. Importantly, we observed no CFU differences in feces at the time  
 189 of harvest (Figure S3A), excluding the possibility that differences in IEC CFU were caused by  
 190 differences in luminal *Shigella* density. These data suggest that *Shigella* colonizes the intestinal  
 191 tissue during infection of either genotype but can only invade the epithelium and provoke disease in  
 192 NAIP–NLRC4-deficient mice.

193

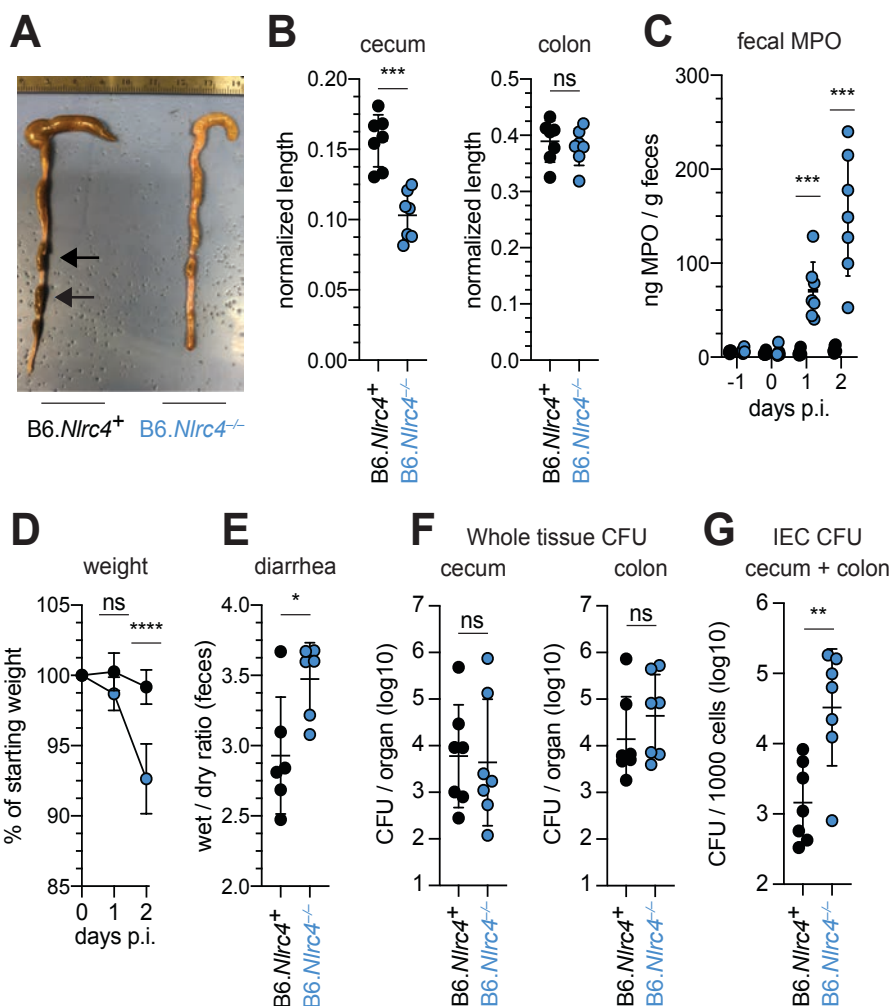

**Figure 3. *Shigella*-infected B6.Nlrc4<sup>-/-</sup> mice exhibit intestinal inflammation and bacterial colonization of IECs.**

(A–E) B6.Nlrc4<sup>+/-</sup> and B6.Nlrc4<sup>-/-</sup> littermates were cohoused with B6.WT mice for a minimum of three weeks. Mice were infected as described for Figure 2. Endpoint harvests were performed 48 hours post-infection (p.i.). B6.Nlrc4<sup>+/-</sup> and B6.WT mice are collectively referred to as B6.Nlrc4<sup>+</sup>.

(A) Representative images of the cecum and colon dissected from B6.Nlrc4<sup>+</sup> and B6.Nlrc4<sup>-/-</sup> mice. Note the cecum tissue thickening (size reduction), macroscopic edema, and loose stool (absence of arrows).

(B) Quantification of cecum and colon lengths. Values were normalized to mouse weight prior to infection; cecum length (cm) / mouse weight (g).

(C) MPO levels measured by ELISA from feces of B6.Nlrc4<sup>+</sup> and B6.Nlrc4<sup>-/-</sup> mice collected -1 through 2 days p.i.

(D) Mouse weights from 0 through 2 days p.i. Each symbol represents the mean for all mice of the indicated condition.

(E) Quantification of feces weights before and after dehydration at 2 days p.i. A larger ratio indicates diarrhea.

(F) CFU determination from gentamicin-treated whole tissue homogenates from the cecum or colon of infected mice.

(G) CFU determination from the IEC enriched fraction of gentamicin-treated cecum and colon tissue (combined).

(B,C,E–G) Each symbol represents one mouse. Data are representative of three independent experiments. Mean ± SD is shown in (B,D,E), Mann-Whitney test, \**P* < 0.05, \*\**P* < 0.01, \*\*\**P* < 0.001.

### 194 *Shigella* causes bloody diarrheal disease in 129.Nlrc4<sup>-/-</sup> mice

195 To determine whether the role of NAIP–NLRC4 in mediating protection against *Shigella* is robust

196 across diverse mouse strains, we generated Nlrc4<sup>-/-</sup> mice on the 129S1 genetic background.

197 129.Nlrc4<sup>-/-</sup> mice have a 10bp deletion in exon 5 of the Nlrc4 coding sequence, resulting in loss of

198 NLRC4 function (Figure S4). Importantly, 129S1 mice are naturally deficient in CASP11, which

199 responds to cytosolic LPS, and thus 129.Nlrc4<sup>-/-</sup> mice lack functional NAIP–NLRC4 and CASP11

200 signaling.

201

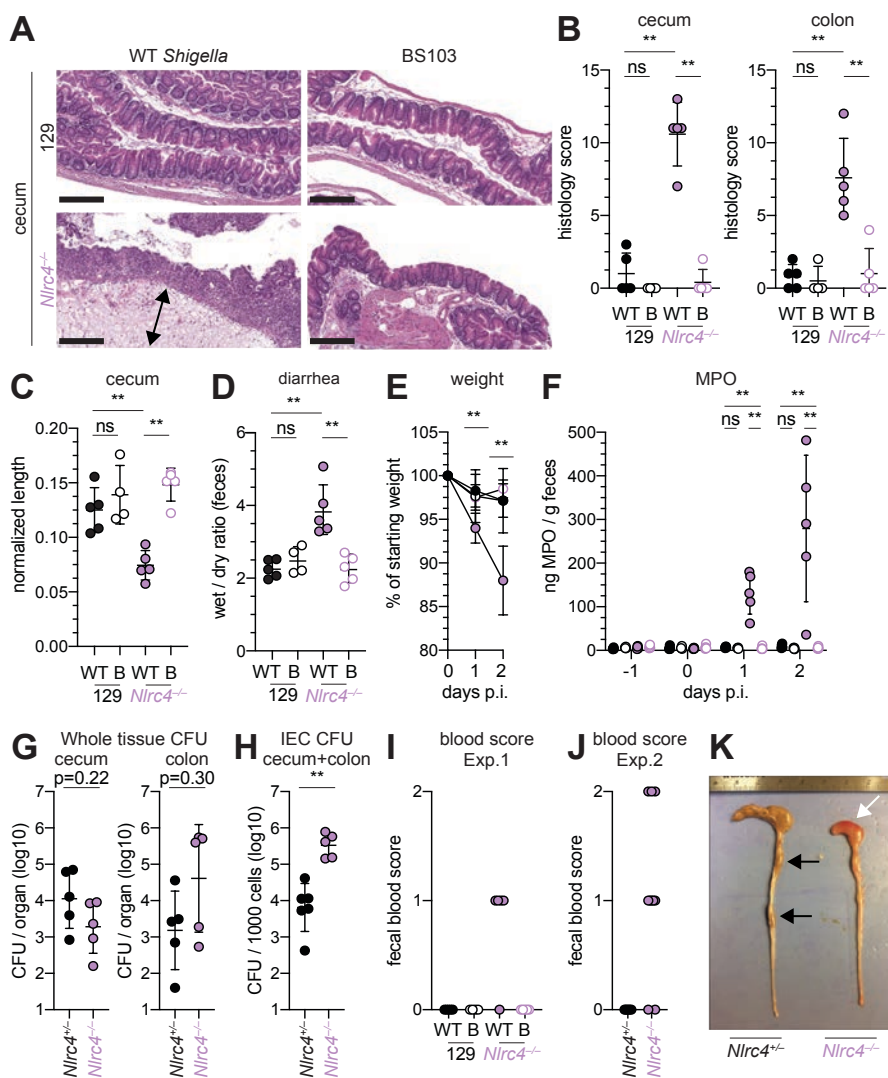

**Figure 4. *Shigella*-infected 129.*Nlrc4*<sup>-/-</sup> mice exhibit hallmarks of severe human shigellosis.**

(A–H) 129.*Nlrc4*<sup>+/+</sup> and 129.*Nlrc4*<sup>-/-</sup> littermates were infected as described for Figure 2. Endpoint harvests were performed at 48 hours post-infection (p.i.).

(A) Representative images of H&E stained cecum and colon tissue from infected mice. Scale bar, 200µm.

(B) Blinded quantification of histology score (cumulative) for tissues in (A). Edema, hyperplasia, inflammatory infiltrate, and epithelial cell death were scored from 0–4. The final score is the sum of individual scores from each category.

(C) Quantification of cecum and colon lengths. Values were normalized to mouse weight prior to infection; cecum length (cm) / mouse weight (g).

(D) Quantification of feces weights before and after dehydration at two days p.i. A larger ratio indicates diarrhea.

(E) Mouse weights at 0 through 2 days p.i. Each symbol represents the mean for all mice of the indicated condition. Statistics refer to both WT *Shigella*-infected 129.*Nlrc4*<sup>+/+</sup> and 129.*Nlrc4*<sup>-/-</sup> mice and WT versus BS103 *Shigella*-infected 129.*Nlrc4*<sup>-/-</sup> mice at both 1 and 2 days p.i. All other comparisons were non-significant.

(F) MPO levels measured by ELISA from feces of 129.*Nlrc4*<sup>+/+</sup> and 129.*Nlrc4*<sup>-/-</sup> mice collected -1 through 2 days p.i.

(G) CFU determination from gentamicin-treated whole tissue homogenates from the cecum or colon

(H) CFU determination from the IEC enriched fraction of gentamicin-treated cecum and colon tissue (combined).

(I, J) Fecal blood scores from feces at two days p.i. 1 = occult blood, 2 = macroscopic blood. (I) and (J) show scores from two representative experiments.

(K) Representative images of the cecum and colon dissected from 129.*Nlrc4*<sup>+/+</sup> and 129.*Nlrc4*<sup>-/-</sup> mice. Note the cecum tissue thickening (size reduction), macroscopic edema, and loose stool (absence of arrows), and vascular lesions and bleeding.

(B–D, F–J) Each symbol represents one mouse. Filled symbols, WT *Shigella*; open symbols, BS103. Data are representative of three independent experiments. Mean ± SD is shown in (B, D, E), Mann-Whitney test, \**P* < 0.05, \*\**P* < 0.01, \*\*\**P* < 0.001.



203 Similar to the B6 genetic background, antibiotic-pretreated 129.*Nlrc4*<sup>-/-</sup> but not 129.*Nlrc4*<sup>+/-</sup>  
204 littermates challenged with WT (or BS103) *Shigella* exhibited severe signs of shigellosis, including  
205 pronounced edema, epithelial cell hyperplasia, and disruption of the columnar epithelium of infected  
206 tissues (**Figure 4A,B**). 129.*Nlrc4*<sup>-/-</sup> mice also exhibited dramatic cecum shrinkage and diarrhea  
207 (**Figure 4C,D,K**), lost between eight and 18 percent of their starting weight within two days of infection  
208 (**Figure 4E**), and exhibited a massive increase in fecal MPO following infection (**Figure 4F**). We found  
209 no significant difference in the bacterial colonization of the whole cecum and colon tissue between  
210 129.*Nlrc4*<sup>+/-</sup> and 129.*Nlrc4*<sup>-/-</sup> mice (**Figure 4G**). However, IECs enriched from infected 129.*Nlrc4*<sup>-/-</sup>  
211 mice again exhibited an ~20-fold higher bacterial burden than IECs enriched from 129.*Nlrc4*<sup>+/-</sup> mice  
212 (**Figure 4H**), despite similar levels of luminal colonization (**Figure S3B**).

213 A hallmark of severe human shigellosis (dysentery) is the presence of blood in patient stools  
214 — a phenotype we did not observe in NAIP–NLRC4-deficient mice on the B6 background. We tested  
215 129.*Nlrc4*<sup>-/-</sup> mouse stools for the presence of occult blood and found that 4/5 mice infected with WT  
216 *Shigella* had occult blood in their feces (**Figure 4I**). In a subsequent infection, 80% (8/10) of  
217 129.*Nlrc4*<sup>-/-</sup> mice had bloody stool (occult blood only, n=5; macroscopically visible blood, n=3) (**Figure**  
218 **4J**). In mice with visible blood, we often observed ruptured blood vessels in the cecum or colon  
219 (**Figure 4K**).

220

### 221 **Epithelial NLRC4 is sufficient to protect mice from shigellosis**

222 Given the difference in *Shigella* colonization of IECs between WT and NAIP–NLRC4-deficient mice,  
223 we next sought to determine if IEC-specific expression of the NAIP–NLRC4 inflammasome is  
224 sufficient to protect mice from *Shigella* infection. We thus infected B6 mice that selectively express  
225 NLRC4 in IECs. These mice encode a Cre-inducible *Nlrc4* gene on an otherwise *Nlrc4*<sup>-/-</sup> background  
226 and are referred to as iNLRC4 mice (**Figure 5A**) (Rauch et al., 2017). Crosses of iNLRC4 and *Vil1-*  
227 *Cre* mice generated animals with selective expression of NLRC4 in Villin<sup>+</sup> IECs. *Shigella* infected *Vil1-*  
228 *Cre*<sup>+</sup> iNLRC4 mice, but not *Cre*<sup>-</sup> littermate controls, were protected from intestinal inflammation to a  
229 similar extent as co-housed *Nlrc4*<sup>+/-</sup> mice (**Figure 5B–F**). Thus, NLRC4 expression in IECs is  
230 sufficient to prevent shigellosis.

231 To further characterize the role of the NAIP–NLRC4 inflammasome during *Shigella* infection of  
232 IECs, we generated intestinal epithelial stem cell-derived organoids from the ceca of 129.WT and  
233 129.*Nlrc4*<sup>-/-</sup> mice, and established a transwell monolayer infection assay (see Methods). We were  
234 unable to recover CFUs from WT IEC monolayers infected with WT *Shigella* (**Figure 5G**). In contrast,  
235 129.*Nlrc4*<sup>-/-</sup> IEC monolayers supported replication of WT *Shigella*. The avirulent non-invasive BS103  
236 strain was detected sporadically at low levels, independent of NAIP–NLRC4, while a strain lacking  
237 *lcsA*, a protein essential for *Shigella* actin tail formation and cell-to-cell spread (Bernardini et al., 1989;  
238 Goldberg and Theriot, 1995), colonized 129.*Nlrc4*<sup>-/-</sup> IEC monolayers to a lesser extent than WT  
239 *Shigella*, consistent with loss of *lcsA*-mediated cell-to-cell spread. Immunostaining for *Shigella* in  
240 infected IEC organoid cultures also revealed intracellular replication and actin tail formation (detected  
241 by fluorescent phalloidin) exclusively in *Nlrc4*<sup>-/-</sup> IEC monolayers infected with WT *Shigella* (**Figure**  
242 **5H**). Thus, IEC organotypic infections faithfully recapitulate the NAIP–NLRC4-dependent differences  
243 in *Shigella* replication observed *in vivo*. We conclude that the protection mediated by NAIP–NLRC4 is  
244 cell-intrinsic and does not require cytokine signaling to additional immune cell populations, although  
245 such signaling may have additional effects *in vivo*. Importantly, these data further demonstrate that  
246 *Shigella* virulence factors are functional within mouse cells and can initiate invasion and actin-based  
247 motility in mouse IECs, as long as the NAIP–NLRC4 inflammasome is absent.

248

### 249 ***lcsA*-dependent cell-to-cell spread is required for pathogenesis**

250 The *Shigella* *lcsA* protein is required for virulence in humans (Collins et al., 2008; Mani et al., 2016;  
251 Orr et al., 2005). To test if *lcsA* is required for pathogenesis in mice, we infected 129.*Nlrc4*<sup>-/-</sup> mice  
252 with isogenic WT, *lcsA* mutant, or BS103 *Shigella* and monitored disease for eight days. Mice infected  
253 with WT *Shigella* exhibited weight loss (**Figure 6A**), diarrhea (**Figure 6B**), increases in fecal MPO  
254 (**Figure 6C**), and blood in their stool (**Figure 6D**). Signs of disease in WT-infected mice peaked

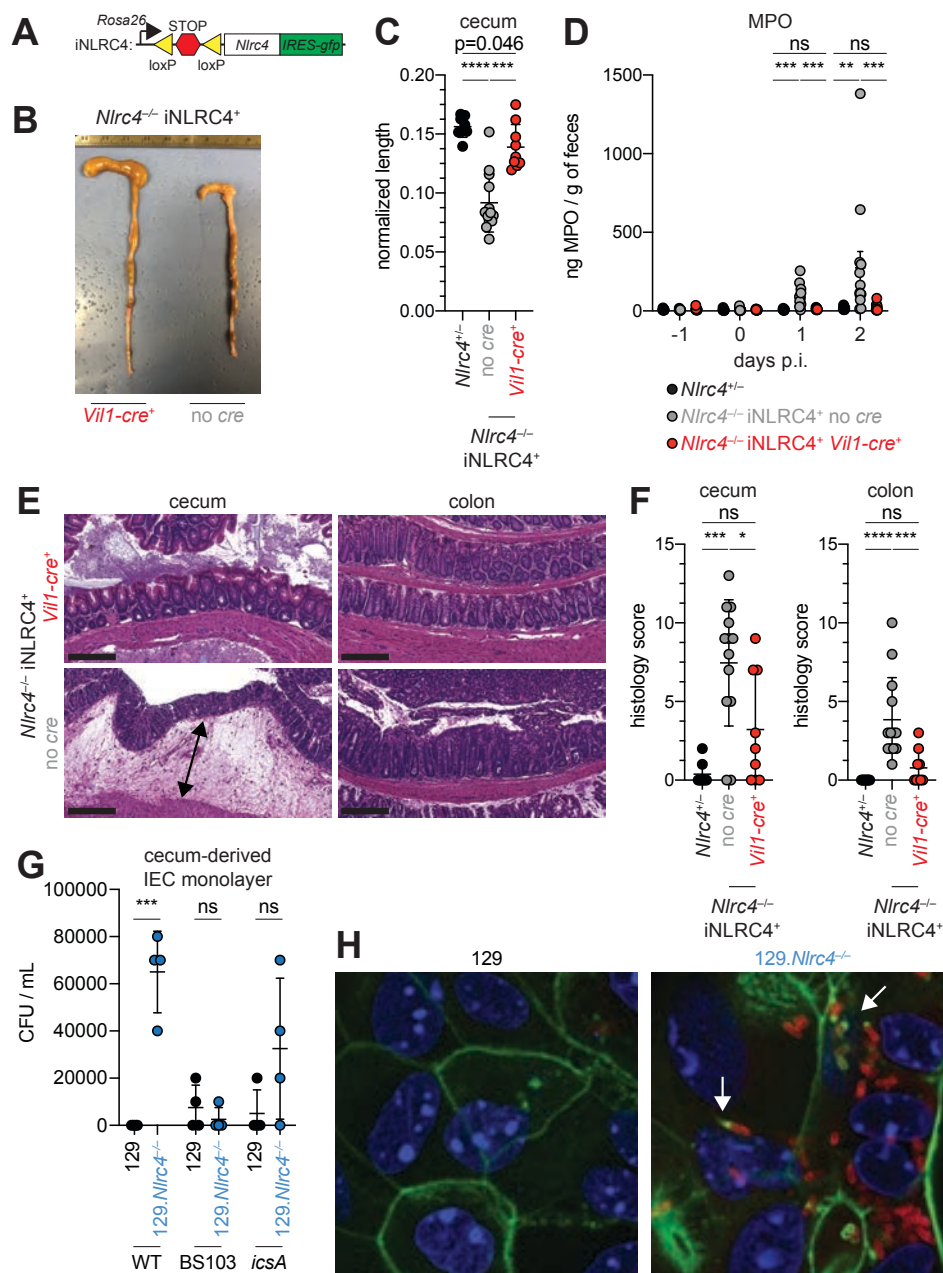

**Figure 5. *Nlrc4* expression in IECs is sufficient to prevent shigellosis.**

(A) Schematic of the B6 *Rosa26* locus containing the iNLR4 cassette, as described previously (Rauch et al., 2017).

(B–F) *Vil1-cre* positive (+) or negative *Nlrc4*<sup>-/-</sup> iNLR4 littermates, or *Nlrc4*<sup>+/-</sup> mice were orally infected with 5x10<sup>7</sup> CFU of WT *Shigella* 24 hours after oral streptomycin treatment. Endpoint harvests were done 48 hours post-infection (p.i.).

(B) Representative images of the cecum and colon dissected from iNLR4 *Nlrc4*<sup>-/-</sup> *Vil1-cre* positive or negative mice.

(C) Quantification of cecum length reduction normalized to the weight of the animal prior to infection; cecum length (cm) / mouse weight (g).

(D) MPO levels measured by ELISA of feces collected -1 through 2 days p.i.

(E) Representative images of H&E stained cecum and colon tissue from infected mice. Scale bar, 200µm.

(F) Blinded quantification of histology score (cumulative) for cecum and colon tissue.

Data are representative of two independent experiments. Mean ± SD is shown in (C,D,F), Mann-Whitney test, \**P* < 0.05, \*\**P* < 0.01, \*\*\**P* < 0.001. (C,D,F) Each symbol represents one mouse.

(G) *Shigella* (WT, BS103, or *icsA*) CFU from transwell culture of WT or 129.*Nlrc4*<sup>-/-</sup> cecum-derived IEC monolayers. CFU was determined 8 hours p.i. Each symbol represents one infected monolayer.

(H) Immunofluorescent staining of WT *Shigella* infected transwell cultures of WT or 129.*Nlrc4*<sup>-/-</sup> cecum-derived IEC monolayers: green, fluorescent phalloidin (actin); red, anti-*Shigella* LPS, blue, DAPI (nucleic acid).

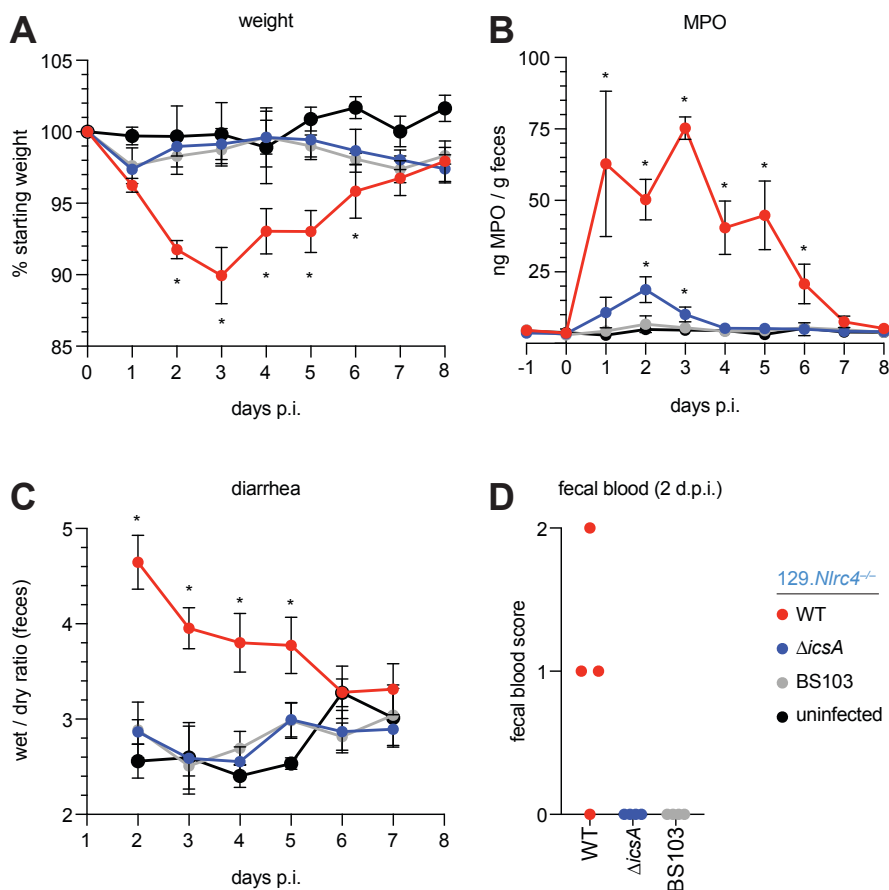

**Figure 6. 129.Nlrc4<sup>-/-</sup> mice are resistant to attenuated *Shigella* strains.**

(A–D) 129.Nlrc4<sup>-/-</sup> littermates were uninfected (black) or inoculated orally with 5x10<sup>7</sup> CFU of WT (red), *icsA* mutant (blue), or BS103 (grey) *Shigella* 24 hours after oral streptomycin treatment and monitored for 8 days post-infection (p.i.).

(A) Mouse weights.

(B) MPO levels measured by ELISA from feces collected -1 through 8 days p.i.

(C) Quantification of diarrhea comparing weight of feces before and after dehydration. A larger ratio indicates diarrhea.

(D) Fecal blood scores from feces at two days post-infection (d.p.i.). 1 = occult blood, 2 = macroscopic blood. Each symbol represents feces from one mouse.

(A–C) Each symbol represents the mean at a specific time point for four individual mice per infection condition. Data are representative of two independent experiments. Mean  $\pm$  SEM is shown in (A–C) Mann-Whitney test, \**P* < 0.05. In (A,B) significance was determined by independently comparing to Day 0 and to BS103 + uninfected at the same day. In (C), significance was determined by comparing to BS103 + uninfected at the same day.

256 between 2-3 days post-infection with weight loss, stool consistency, and MPO signal returning to  
 257 baseline levels at approximately seven days post-infection, consistent with the disease progression  
 258 and resolution of human shigellosis. Interestingly, 129.Nlrc4<sup>-/-</sup> mice infected with *icsA* mutant *Shigella*  
 259 did not experience weight loss, diarrhea, or fecal blood, and largely phenocopied mice infected with  
 260 the non-invasive BS103 strain (Figures 6A–D). We did observe a slight but significant increase in  
 261 fecal MPO levels at 1-3 days post-infection in these mice (Figure 6B). These results suggest that, as  
 262 in humans (Coster et al., 1999; Kotloff et al., 1996), *icsA* mutants can provoke mild inflammation upon  
 263 initial colonization of the intestinal epithelium, but that dissemination of bacteria among IECs is a  
 264 critical driver of severe disease.

265

## 266 Discussion

267 Here we demonstrate that the NAIP–NLRC4 inflammasome is a formidable species-specific barrier to  
 268 *Shigella* invasion of the intestinal epithelium. *Shigella* infection of antibiotic pre-treated, NAIP–NLRC4–

269 deficient mice recapitulates key features of human shigellosis, including bacterial invasion of and  
270 replication in IECs, severe inflammatory disease at relevant sites (e.g., colon, cecum), and bloody  
271 diarrhea. Thus, inflammasome-deficient mice provide the first physiologically relevant mouse model of  
272 bacillary dysentery, paving the way for genetic and mechanistic *in vivo* studies of the host factors  
273 underlying *Shigella* pathogenesis that have long been elusive.

274 A long-held belief is that *Shigella* exploits inflammasomes to induce pyroptosis. Pyroptotic cell  
275 death is presumed to allow bacteria to escape macrophages and invade the basolateral surface of  
276 polarized enterocytes (Ashida et al., 2014; Lamkanfi and Dixit, 2010; Schnupf and Sansonetti, 2019).  
277 Although we do not directly address this possibility, our experiments suggest that *Shigella* has instead  
278 evolved to inhibit the human NAIP–NLRC4 inflammasome to evade intestinal epithelial cell death.  
279 Indeed, we find that the NAIP–NLRC4 inflammasome plays a critical role in host defense by limiting  
280 *Shigella* replication and spread in IECs. Further supporting this notion, only *Nlrc4*<sup>-/-</sup> but not WT IEC  
281 organoid monolayers are permissive to *Shigella* infection. *Salmonella* infected IECs are expelled from  
282 the intestinal epithelial barrier in an NLRC4-dependent manner (Rauch et al., 2017; Sellin et al.,  
283 2014). The same mechanism is also likely to occur during *Shigella* infection and suggests that  
284 epithelial inflammasomes coordinate the expulsion of infected IECs as a general defense strategy  
285 against enteric bacterial pathogens.

286 We only observe bloody diarrhea (dysentery) in *Nlrc4*<sup>-/-</sup> mice generated on the 129 genetic  
287 background. 129 mice naturally harbor a null *Casp11* allele (Kayagaki et al., 2011). Although other  
288 genetic differences may contribute in part to the variation in susceptibility to *Shigella* between B6 and  
289 129 NAIP–NLRC4-deficient mice, we speculate that both the NAIP–NLRC4 and the CASP11  
290 inflammasomes mediate protection in IECs against *Shigella* invasion. However, the susceptibility of  
291 B6 NAIP–NLRC4-deficient (but CASP11<sup>+</sup>) mice, as well as the resistance of *Casp11*<sup>-/-</sup> mice,  
292 suggest that these inflammasomes are not strictly redundant and that NAIP–NLRC4 alone is sufficient  
293 to confer resistance to shigellosis in mice. The *Shigella* effector OspC3 antagonizes the human LPS  
294 sensor CASP4 (Kobayashi et al., 2013), and IEC-expressed CASP4 provides protection against other  
295 human bacterial pathogens (Holly et al., 2020; Knodler et al., 2014), underscoring the importance of  
296 the LPS sensing pathway during human infection. Similarly, our finding that *Shigella* appears to  
297 suppress the human NAIP–NLRC4 inflammasome implies that evasion and/or antagonism of  
298 inflammasomes is a general virulence strategy during human infections.

299 There is currently no licensed *Shigella* vaccine, and very limited knowledge of what vaccine-  
300 induced immune responses would be desirable to elicit to mediate protection (Barry et al., 2013; Mani  
301 et al., 2016). Our new shigellosis model will finally allow the field to leverage the outstanding genetic  
302 tools and reagents in the mouse to address fundamental questions about the immune response to  
303 *Shigella*. Our finding that NAIP–NLRC4 inflammasome-deficient mice clear the attenuated *Shigella*  
304 *icsA* strain, derivatives of which are currently deployed in human vaccine trials (Collins et al., 2008;  
305 Coster et al., 1999; Ranallo et al., 2014), speaks to the readiness of our model to support testing and  
306 development of *Shigella* therapeutics. More broadly, our results also provide a striking example of  
307 how inflammasomes provide an important species-specific barrier against infection.  
308

## 309 **Methods**

310

### 311 **Cell culture**

312 293T cells were cultured in DMEM supplemented with 10% FBS and 2mM L-glutamine. THP1 cells  
313 were cultured in RPMI supplemented with 10% FBS and 2mM L-glutamine. B6 primary BMMs were  
314 cultured in RPMI supplemented with 10% FBS, 5% mCSF, 100U/ml penicillin, 100mg/ml Streptomycin  
315 and 2mM L-glutamine. THP1 cells were a gift from Veit Hornung, and generated as previously  
316 described (Gaidt et al., 2017). Cells were grown in media without antibiotics for infection experiments.  
317

### 318 **Bacterial strains**

319 All experiments were conducted with the *S. flexneri* serovar 2a WT 2457T strain, or the WT-derived  
320 virulence plasmid-cured strain BS103 (Maurelli et al., 1984) or *icsA* mutant (Goldberg and Theriot,  
321 1995; Makino et al., 1986). The *icsA* mutant strain was a gift from Marcia Goldberg. Natural  
322 streptomycin resistant strains of 2457T and BS103 were generated by plating cultured bacteria on  
323 tryptic soy broth (TSB) plates containing 0.01% Congo Red (CR) and increasing concentrations of  
324 streptomycin sulfate. Streptomycin-resistant strains were confirmed to grow indistinguishably from  
325 parental strains in TSB broth lacking antibiotics, indicating an absence of streptomycin-dependence.  
326

### 327 **Toxins**

328 Recombinant proteins for cytosolic delivery of *Shigella* MxiH were produced using the BD  
329 BaculoGOLD system for protein expression in insect cells. The MxiH coding sequence was subcloned  
330 into pAcSG2-6xHIS-LFn using the primers: PSMpr943 F (BamHI) 5' - GAAAGG GGATCC ATG AGT  
331 GTT ACA GTA CCG GAT AAA GAT TGG ACT CTG - 3' and PSMpr944 R (NotI) 5' - GAAAGG  
332 GCGGCCGC TTA TCT GAA GTT TTG AAT AAT TGC AGC ATC AAC ATC C - 3'. The PA-6xHIS  
333 coding sequence was subcloned from pET22b-PA-6xHIS(Rauch et al., 2016) into pAcSG2 using the  
334 primers: PSMpr896 F (XhoI) 5' - GAAAGG CTCGAG ATG GAA GTT AAA CAG GAG AAC CGG TTA  
335 TTA AAT GAA TC - 3' and PSMpr897 R (NotI) 5' - GAAAGG GCGGCCGC TCA GTG GTG GTG GTG  
336 GTG GTG T - 3'. Constructs were co-transfected with BestBac linearized baculovirus DNA  
337 (Expression Systems) into SF9 cells following the manufacturer's protocol to generate infectious  
338 baculovirus. Primary virus was amplified in SF9 cells. Recombinant proteins were produced by  
339 infecting 2L of High Five cells with 1ml of amplified virus/L cells. Cells were harvested ~60 hours after  
340 infection by centrifugation at 500xg for 15 minutes. Cell pellets were resuspended in lysis buffer  
341 (50mM Tris pH7.4, 150mM NaCl, 1% NP-40 with protease inhibitors) and lysed on ice using a dounce  
342 homogenizer. Samples were then clarified at 24,000xg for 30 minutes and supernatants were batch  
343 bound to 1ml nickel resin for 2 hours at 4°C. Samples were column purified by gravity. Resin was  
344 washed with 100ml of wash buffer (20mM Tris pH7.4, 400mM NaCl, 20mM imidazole). Sample was  
345 eluted with 1ml fractions of elution buffer (20mM Tris pH7.4, 150mM NaCl, 250mM imidazole). Peak  
346 elutions were pooled and buffer exchanged into 20mM Tris pH7.4.  
347

### 348 **Infection of cells in culture**

349 *S. flexneri* was grown at 37°C on tryptic soy agar plates containing 0.01% Congo red (CR),  
350 supplemented with 100µg/ml spectinomycin and 100 µg/ml carbenicillin for growth of the *icsA* strain.  
351 For infections, a single CR-positive colony was inoculated into 5ml TSB and grown shaking overnight  
352 at 37°C. Saturated cultures were back-diluted 1:100 in 5ml fresh TSB shaking for ~2 hours at 37°C.  
353 THP1 and BMM cells were seeded at 100,000 cells per well of a Nunc F96 MicroWell white  
354 polystyrene plate. Bacteria were washed three times in cell culture media, then spininfected onto cells  
355 for 10 minutes at 500xg. Bacterial invasion was allowed to proceed for an additional 20 minutes at  
356 37°C, followed by three washes in with cell culture media containing 25mg/ml gentamicin. Cells were  
357 then maintained in cell culture media containing 2.5mg/ml gentamicin with propidium iodide (Sigma,  
358 diluted 1:100 from stock) at 37°C for the duration of the assay (30 minutes to 4 hours). A MOI of 10  
359 was used unless otherwise specified. For suppression assays, PMA-differentiated THP1 cells were  
360 infected as described above for 1 hour. Media was then replaced with cell culture media containing

361 2.5mg/ml gentamicin and propidium iodide (1:100) and either 10µg/ml PA only, PA with 1.0µg/ml LFn-  
362 MxiH, or 10µM nigericin. PI uptake was measured using a SpectraMax M2 plate reader, and 100%  
363 cell death was set by normalizing values of infected wells to cells lysed with 1% Triton X-100 after  
364 background subtraction based on media only controls.

365

### 366 **Establishment, propagation and infection of IECs**

367 Primary intestinal epithelial stem cell-derived organoids from the cecum were isolated and maintained  
368 in culture as previously described (Miyoshi and Stappenbeck, 2013). Each transwell monolayer culture  
369 was established 1:1 from a confluent enteroid Matrigel (Corning, 356255) 'dome.' Enteroids were  
370 disassociated from Matrigel with 0.25% trypsin for 10 minutes, manually disrupted, resuspended in  
371 monolayer culture wash media (ADMEM/F12 supplemented with 20% FBS, 1% L-glutamine) and  
372 plated on polycarbonate transwells (Corning, 3413) that had been pre-coated for >1 hour at 37°C with  
373 1:30 Matrigel:wash media. Monolayer cultures were differentiated for 12-14 days in complete  
374 monolayer culture media (monolayer culture wash media mixed 1:1 with LWRN-conditioned media  
375 supplemented with 10µM Y27632 (Stem Cell), and RANKL (BioLegend) in the absence of SB431542).  
376 Two days prior to infection, cells were cultured in antibiotic-free monolayer culture media. Monolayers  
377 were treated with 20µM EGTA for 15 minutes prior to *Shigella* infection (MOI=10). Bacterial invasion  
378 was allowed to proceed for 2 hours, followed by gentamicin washes as described above to both upper  
379 and lower compartments, then maintained in monolayer culture media containing 2.5mg/ml  
380 gentamicin with propidium iodide (Sigma, diluted 1:100 from stock) at 37°C for the duration of the  
381 assay (1 hour for IF and 8 hours for CFU determination). For IF, cells were washed in PBS, fixed in  
382 4% paraformaldehyde for 15 minutes, permeabilized in 0.1% Triton X-100 for 15 minutes, blocked in  
383 PBS with 2% BSA, 0.1% Tween-20 for 1 hour. Primary antibodies were incubated overnight, followed  
384 by 1 hour stain with fluorophore-conjugated secondary antibodies and 10 minute staining with DAPI  
385 and fluorophore-conjugated phalloidin. Slides were analyzed on a Zeiss LSM710. Antibodies: anti-  
386 *Shigella* (Abcam, ab65282), 488 phalloidin (PHDG1-A, Cytoskeleton Inc.), Alexfluor conjugated  
387 secondary antibodies (Invitrogen). To determine bacterial replication in IECs, 8h post-infection  
388 monolayers were washed three times with PBS, lysed in 1% Triton X-100, and bacteria were plated  
389 for CFU determination.

390

### 391 **Reconstituted NAIP–NLRC4 inflammasome activity assays**

392 To reconstitute inflammasome activity in 293T cells, constructs (100ng of each) producing human  
393 NAIP, NLRC4, CASP1 and IL-1β were co-transfected with constructs (200ng of each) producing  
394 *Shigella* MxiI, MxiH or empty vector (pcDNA3) using Lipofectamine 2000 (Invitrogen) following the  
395 manufacturer's protocol and harvested 24 hours post-transfection. For experiments using recombinant  
396 proteins, fresh media containing 10µg/ml PA and 1.0µg/ml LFn-MxiH was added to cells for 3-4 hours.  
397 In all experiments, cells were lysed in RIPA buffer with protease inhibitor cocktail (Roche).

398

### 399 **Immunoblot and antibodies**

400 Lysates were clarified by spinning at 16,100xg for 10 minutes at 4°C. Clarified lysates were denatured  
401 in SDS loading buffer. Samples were separated on NuPAGE Bis-Tris 4-12% gradient gels  
402 (ThermoFisher) following the manufacturer's protocol. Proteins were transferred onto Immobilon-FL  
403 PVDF membranes at 375mA for 90 minutes and blocked with Odyssey blocking buffer (Li-Cor).  
404 Proteins were detected on a Li-Cor Odyssey Blot Imager using the following primary and secondary  
405 antibodies: anti-IL-1β (R&D systems, AF-201-NA), anti-GFP (Clontech, JL8), anti-TUBULIN (Sigma,  
406 clone TUB 2.1), Alexfluor-680 conjugated secondary antibodies (Invitrogen).

407

### 408 **Animal Procedures**

409 All mice were maintained in a specific pathogen free colony until 1-2 weeks prior to infection,  
410 maintained under a 12 hour light-dark cycle (7am to 7pm), and given a standard chow diet (Harlan  
411 irradiated laboratory animal diet) ad libitum. Wild-type C57BL/6J and 129S1/SvImJ mice were  
412 originally obtained from the Jackson Laboratories. 129.Nlrc4<sup>-/-</sup> animals were generated by targeting

413 *Nlrc4* via CRISPR-Cas9 mutagenesis. CRISPR/Cas9 targeting was performed by pronuclear injection  
414 of Cas9 mRNA and sgRNA into fertilized zygotes, essentially as described previously (Wang et al.,  
415 2013). Founder mice were genotyped by PCR and sequencing using the primers: JLR035 F 5'  
416 CAGGTCACAGAAG AAGACCTGAATG 3' and JLR036 R 5' CACCTGGACTCCTGGATTTGG 3'.  
417 Founders carrying mutations were bred one generation to wild-type mice to separate modified  
418 haplotypes. Homozygous lines were generated by interbreeding heterozygotes carrying matched  
419 haplotypes. B6. $\Delta$ *Naip* mice were generated as described previously (Rauch et al., 2016). B6.*Nlrc4*<sup>-/-</sup>  
420 mice and iNLRC4 mice were generated as described previously (Rauch et al., 2017). iNLRC4 mice  
421 were crossed to the *Nlrc4*<sup>-/-</sup> line and then further crossed to *Vil1-cre* (Jax strain 004586) transgenic  
422 lines on a *Nlrc4*<sup>-/-</sup> background. Animals used in infection experiments were littermates or, if not  
423 possible, were co-housed upon weaning. In rare cases when mice were not co-housed upon weaning,  
424 mice were co-housed for at least one week prior to infection. Animals were transferred from a SPF  
425 colony to an ABSL2 facility at least one weeks prior to infection. All animal experiments complied with  
426 the regulatory standards of, and were approved by, the University of California, Berkeley Animal Care  
427 and Use Committee.

428

### 429 ***In vivo Shigella* infections**

430 Mouse infections were performed in 6-16 week old mice. Initially, mice deprived of food and water for  
431 4-6 hours were orally gavaged with 100 $\mu$ L of 250 mg/mL streptomycin sulfate dissolved in water (25  
432 mg/mouse) and placed in a cage with fresh bedding. 24 hours later, mice again deprived of food and  
433 water for 4-6 hours were orally gavaged with 100 $\mu$ L of 5x10<sup>8</sup> CFU (5x10<sup>7</sup> CFUs per mouse) of log-  
434 phase, streptomycin resistant *Shigella flexneri* 2457T, BS103, or *icsA* mutant 2457T prepared as  
435 above and resuspended in PBS. Mouse weights and fecal pellets were recorded or collected daily  
436 from one day prior to infection to the day of euthanasia and harvest (usually 2 days post-infection) to  
437 assess the severity of disease and biomarkers of inflammation. Infection inputs were determined by  
438 serially diluting a fraction of the initial inoculum and plating on TSB plates containing 0.01% CR and  
439 100 $\mu$ g/mL streptomycin.

440

### 441 **Fecal CFUs, fecal MPO ELISAs, wet/dry ratio, fecal occult blood**

442 Fecal pellets were collected in 2mL tubes, suspended in 2% FBS in 1mL of PBS containing protease  
443 inhibitors, and homogenized. For CFU enumeration, serial dilutions were made in PBS and plated on  
444 TSB plates containing 0.01% CR and 100  $\mu$ g/mL streptomycin sulfate. For MPO ELISAs, fecal  
445 homogenates were spun at 2,000g and supernatants were plated in triplicate on absorbent  
446 immunoassay 96-well plates. Recombinant mouse MPO standard, MPO capture antibody, and MPO  
447 sandwich antibody were purchased from R&D. Wet/dry ratios were determined by weighing fecal  
448 pellets before and after they had been dried in a fume hood. The presence or absence of fecal occult  
449 blood in fresh pellets was determined using a Hemocult blood testing kit (Beckman Coulter).

450

### 451 **Histology**

452 Mice were euthanized at two days post-infection by CO<sub>2</sub> inhalation and cervical dislocation. Ceca and  
453 colons from mice were isolated, cut longitudinally, removed of luminal contents, swiss-rolled, and  
454 fixed in methacarn followed by transfer to 70% ethanol. Samples were processed by routine histologic  
455 methods on an automated tissue processor (TissueTek, Sakura), embedded in paraffin, sectioned at  
456 4 $\mu$ m thickness on a rotary microtome, and mounted on glass slides. Sections were stained with  
457 hematoxylin and eosin on an automated histostainer and coverslipped. Histopathological evaluation  
458 was performed by light microscopy (Olympus BX45, Olympus Corporation) at magnifications ranging  
459 from x20 to x600 by a board-certified veterinary pathologist (I.L.B.) who was blinded to the  
460 experimental groups at the time of evaluation. Representative images were generated as Tiff files  
461 from digitized histology slides scanned on a digital slide scanner (Leica Aperio AT2, Leica  
462 Biosystems). Images were taken using freely downloadable software (Image Scope, Leica Aperio,  
463 Leica Biosystems) and processed in Adobe Photoshop. Photo processing was confined to global  
464 adjustments of image size, white balance, contrast, brightness, sharpness, or correction of lens

465 distortion and did not alter the interpretation of the image. Sample preparation, imaging, and histology  
466 scoring was conducted by the Unit for Laboratory Animal Medicine at the University of Michigan.  
467

#### 468 **Intestinal CFU determination**

469 To enumerate whole tissue intestinal CFU, ceca and colons from mice were isolated, cut longitudinally  
470 and removed of luminal contents, placed in culture tubes containing 400µg/mL gentamicin antibiotic  
471 in PBS, vortexed, and incubated in this solution for 1-2 hours. Organs were washed 5 times in PBS to  
472 dilute the gentamicin, homogenized in 1mL of PBS, serially diluted, and plated on TSB agar plates  
473 containing 0.01% CR and 100µg/mL streptomycin. To enumerate intracellular CFU from the intestinal  
474 epithelial cell fraction of the cecum and colon, organs prepared as above were incubated in RPMI with  
475 5% FBS, 2mM L-glutamine, and 400µg/ml of gentamicin for 1-2 hours. Tissues were then washed 5  
476 times in PBS, cut into 1cm pieces, placed in 15mL of stripping solution (HBSS, 10mM HEPES, 1mM  
477 DTT, 2.6mM EDTA), and incubated at 37°C for 25 minutes with gentle agitation. Supernatants were  
478 passed through a 100 µm filter and the remaining pieces of tissue were shaken in a 50mL conical with  
479 10 mL of PBS and passed again through the 100µm filter. This enriched epithelial cell fraction was  
480 incubated in 50µg/mL gentamicin for 25 minutes on ice, spun at 300xg at 4°C for 8 minutes, and  
481 washed twice by aspirating the supernatant, resuspending in PBS, and spinning at 300xg at 4°C for 5  
482 minutes. After the first wash, a fraction of cells were set aside to determine the cell count. After the  
483 second wash, the pellet was resuspended and lysed in 1mL of 1% Triton X-100. Serial dilutions were  
484 made from this solution and plated on TSB agar plates containing 0.01% CR and 100µg/ml  
485 streptomycin and CR+ positive colonies were counted following overnight incubation at 37°C.  
486  
487



## 488 References

489

- 490 Ashida, H., Kim, M., and Sasakawa, C. (2014). Manipulation of the host cell death pathway by  
491 *Shigella*. *Cell Microbiol* *16*, 1757-1766.
- 492 Barry, E.M., Pasetti, M.F., Sztein, M.B., Fasano, A., Kotloff, K.L., and Levine, M.M. (2013). Progress  
493 and pitfalls in *Shigella* vaccine research. *Nature reviews Gastroenterology & hepatology* *10*, 245-255.
- 494 Bernardini, M.L., Mounier, J., d'Hauteville, H., Coquis-Rondon, M., and Sansonetti, P.J. (1989).  
495 Identification of *icsA*, a plasmid locus of *Shigella flexneri* that governs bacterial intra- and intercellular  
496 spread through interaction with F-actin. *Proc Natl Acad Sci U S A* *86*, 3867-3871.
- 497 Collins, T.A., Barnoy, S., Baqar, S., Ranallo, R.T., Nemeika, K.W., and Venkatesan, M.M. (2008).  
498 Safety and colonization of two novel VirG(*lcsA*)-based live *Shigella sonnei* vaccine strains in rhesus  
499 macaques (*Macaca mulatta*). *Comparative medicine* *58*, 88-94.
- 500 Coster, T.S., Hoge, C.W., VanDeVerg, L.L., Hartman, A.B., Oaks, E.V., Venkatesan, M.M., Cohen, D.,  
501 Robin, G., Fontaine-Thompson, A., Sansonetti, P.J., *et al.* (1999). Vaccination against shigellosis with  
502 attenuated *Shigella flexneri* 2a strain SC602. *Infect Immun* *67*, 3437-3443.
- 503 Crowley, S.M., Han, X., Allaire, J.M., Stahl, M., Rauch, I., Knodler, L.A., and Vallance, B.A. (2020).  
504 Intestinal restriction of *Salmonella Typhimurium* requires caspase-1 and caspase-11 epithelial intrinsic  
505 inflammasomes. *PLoS pathogens* *16*, e1008498.
- 506 DuPont, H.L., Hornick, R.B., Dawkins, A.T., Snyder, M.J., and Formal, S.B. (1969). The response of  
507 man to virulent *Shigella flexneri* 2a. *J Infect Dis* *119*, 296-299.
- 508 DuPont, H.L., Levine, M.M., Hornick, R.B., and Formal, S.B. (1989). Inoculum size in shigellosis and  
509 implications for expected mode of transmission. *J Infect Dis* *159*, 1126-1128.
- 510 Freter, R. (1956). Experimental enteric *Shigella* and *Vibrio* infections in mice and guinea pigs. *The*  
511 *Journal of experimental medicine* *104*, 411-418.
- 512 Gaidt, M.M., Ebert, T.S., Chauhan, D., Ramshorn, K., Pinci, F., Zuber, S., O'Duill, F., Schmid-Burgk,  
513 J.L., Hoss, F., Buhmann, R., *et al.* (2017). The DNA Inflammasome in Human Myeloid Cells Is  
514 Initiated by a STING-Cell Death Program Upstream of NLRP3. *Cell* *171*, 1110-1124 e1118.
- 515 Gao, W., Yang, J., Liu, W., Wang, Y., and Shao, F. (2016). Site-specific phosphorylation and  
516 microtubule dynamics control Pyrin inflammasome activation. *Proc Natl Acad Sci U S A* *113*, E4857-  
517 4866.
- 518 Goldberg, M.B., and Theriot, J.A. (1995). *Shigella flexneri* surface protein *lcsA* is sufficient to direct  
519 actin-based motility. *Proc Natl Acad Sci U S A* *92*, 6572-6576.
- 520 Holly, M.K., Han, X., Zhao, E.J., Crowley, S.M., Allaire, J.M., Knodler, L.A., Vallance, B.A., and Smith,  
521 J.G. (2020). *Salmonella enterica* infection of murine and human enteroid-derived monolayers elicits  
522 differential activation of epithelial-intrinsic inflammasomes. *Infect Immun*.
- 523 Islam, D., Ruamsap, N., Khantapura, P., Aksomboon, A., Srijan, A., Wongstitwilairoong, B.,  
524 Bodhidatta, L., Gettayacamin, M., Venkatesan, M.M., and Mason, C.J. (2014). Evaluation of an  
525 intragastric challenge model for *Shigella dysenteriae* 1 in rhesus monkeys (*Macaca mulatta*) for the  
526 pre-clinical assessment of *Shigella* vaccine formulations. *APMIS : acta pathologica, microbiologica, et*  
527 *immunologica Scandinavica* *122*, 463-475.
- 528 Jeong, K.I., Zhang, Q., Nunnari, J., and Tzipori, S. (2010). A piglet model of acute gastroenteritis  
529 induced by *Shigella dysenteriae* Type 1. *J Infect Dis* *201*, 903-911.
- 530 Kayagaki, N., Stowe, I.B., Lee, B.L., O'Rourke, K., Anderson, K., Warming, S., Cuellar, T., Haley, B.,  
531 Roose-Girma, M., Phung, Q.T., *et al.* (2015). Caspase-11 cleaves gasdermin D for non-canonical  
532 inflammasome signalling. *Nature* *526*, 666-671.
- 533 Kayagaki, N., Warming, S., Lamkanfi, M., Vande Walle, L., Louie, S., Dong, J., Newton, K., Qu, Y.,  
534 Liu, J., Heldens, S., *et al.* (2011). Non-canonical inflammasome activation targets caspase-11. *Nature*  
535 *479*, 117-121.
- 536 Khalil, I.A., Troeger, C., Blacker, B.F., Rao, P.C., Brown, A., Atherly, D.E., Brewer, T.G., Engmann,  
537 C.M., Houpt, E.R., Kang, G., *et al.* (2018). Morbidity and mortality due to shigella and enterotoxigenic  
538 *Escherichia coli* diarrhoea: the Global Burden of Disease Study 1990-2016. *Lancet Infect Dis* *18*,  
539 1229-1240.

- 540 Knodler, L.A., Crowley, S.M., Sham, H.P., Yang, H., Wrands, M., Ma, C., Ernst, R.K., Steele-  
541 Mortimer, O., Celli, J., and Vallance, B.A. (2014). Noncanonical inflammasome activation of caspase-  
542 4/caspase-11 mediates epithelial defenses against enteric bacterial pathogens. *Cell Host Microbe* 16,  
543 249-256.
- 544 Kobayashi, T., Ogawa, M., Sanada, T., Mimuro, H., Kim, M., Ashida, H., Akakura, R., Yoshida, M.,  
545 Kawalec, M., Reichhart, J.M., *et al.* (2013). The Shigella OspC3 effector inhibits caspase-4,  
546 antagonizes inflammatory cell death, and promotes epithelial infection. *Cell Host Microbe* 13, 570-  
547 583.
- 548 Kortmann, J., Brubaker, S.W., and Monack, D.M. (2015). Cutting Edge: Inflammasome Activation in  
549 Primary Human Macrophages Is Dependent on Flagellin. *J Immunol* 195, 815-819.
- 550 Kotloff, K.L., Noriega, F., Losonsky, G.A., Sztein, M.B., Wasserman, S.S., Nataro, J.P., and Levine,  
551 M.M. (1996). Safety, immunogenicity, and transmissibility in humans of CVD 1203, a live oral Shigella  
552 flexneri 2a vaccine candidate attenuated by deletions in *aroA* and *virG*. *Infect Immun* 64, 4542-4548.
- 553 Kotloff, K.L., Riddle, M.S., Platts-Mills, J.A., Pavlinac, P., and Zaidi, A.K.M. (2018). Shigellosis. *Lancet*  
554 391, 801-812.
- 555 Lamkanfi, M., and Dixit, V.M. (2010). Manipulation of host cell death pathways during microbial  
556 infections. *Cell Host Microbe* 8, 44-54.
- 557 Lamkanfi, M., and Dixit, V.M. (2014). Mechanisms and functions of inflammasomes. *Cell* 157, 1013-  
558 1022.
- 559 Makino, S., Sasakawa, C., Kamata, K., Kurata, T., and Yoshikawa, M. (1986). A genetic determinant  
560 required for continuous reinfection of adjacent cells on large plasmid in *S. flexneri* 2a. *Cell* 46, 551-  
561 555.
- 562 Mani, S., Wierzbica, T., and Walker, R.I. (2016). Status of vaccine research and development for  
563 Shigella. *Vaccine* 34, 2887-2894.
- 564 Martino, M.C., Rossi, G., Martini, I., Tattoli, I., Chiavolini, D., Phalipon, A., Sansonetti, P.J., and  
565 Bernardini, M.L. (2005). Mucosal lymphoid infiltrate dominates colonic pathological changes in murine  
566 experimental shigellosis. *J Infect Dis* 192, 136-148.
- 567 Aurelli, A.T., Blackmon, B., and Curtiss, R., 3rd (1984). Loss of pigmentation in Shigella flexneri 2a  
568 is correlated with loss of virulence and virulence-associated plasmid. *Infect Immun* 43, 397-401.
- 569 McGuire, C.D., and Floyd, T.M. (1958). Studies on experimental shigellosis. I. Shigella infections of  
570 normal mice. *The Journal of experimental medicine* 108, 269-276.
- 571 Medeiros, Q.S.P.H., Ledwaba, S.E., Bolick, D.T., Giallourou, N., Yum, L.K., Costa, D.V.S., Oria, R.B.,  
572 Barry, E.M., Swann, J.R., Lima, A.A.M., *et al.* (2019). A murine model of diarrhea, growth impairment  
573 and metabolic disturbances with Shigella flexneri infection and the role of zinc deficiency. *Gut*  
574 *microbes* 10, 615-630.
- 575 Miyoshi, H., and Stappenbeck, T.S. (2013). In vitro expansion and genetic modification of  
576 gastrointestinal stem cells in spheroid culture. *Nat Protoc* 8, 2471-2482.
- 577 Mostowy, S., Boucontet, L., Mazon Moya, M.J., Sirianni, A., Boudinot, P., Hollinshead, M., Cossart,  
578 P., Herbomel, P., Levraud, J.P., and Colucci-Guyon, E. (2013). The zebrafish as a new model for the  
579 in vivo study of Shigella flexneri interaction with phagocytes and bacterial autophagy. *PLoS*  
580 *pathogens* 9, e1003588.
- 581 Orr, N., Katz, D.E., Atsmon, J., Radu, P., Yavzori, M., Halperin, T., Sela, T., Kayouf, R., Klein, Z.,  
582 Ambar, R., *et al.* (2005). Community-based safety, immunogenicity, and transmissibility study of the  
583 Shigella sonnei WRSS1 vaccine in Israeli volunteers. *Infect Immun* 73, 8027-8032.
- 584 Ranallo, R.T., Kaminski, R., Baqar, S., Dutta, M., Lugo-Roman, L.A., Boren, T., Barnoy, S., and  
585 Venkatesan, M.M. (2014). Oral administration of live Shigella vaccine candidates in rhesus monkeys  
586 show no evidence of competition for colonization and immunogenicity between different serotypes.  
587 *Vaccine* 32, 1754-1760.
- 588 Ranjbar, R., and Farahani, A. (2019). Shigella: Antibiotic-Resistance Mechanisms And New Horizons  
589 For Treatment. *Infection and drug resistance* 12, 3137-3167.
- 590 Raqib, R., Mia, S.M., Qadri, F., Alam, T.I., Alam, N.H., Chowdhury, A.K., Mathan, M.M., and  
591 Andersson, J. (2000). Innate immune responses in children and adults with Shigellosis. *Infect Immun*  
592 68, 3620-3629.

593 Rathinam, V.A., and Fitzgerald, K.A. (2016). Inflammasome Complexes: Emerging Mechanisms and  
594 Effector Functions. *Cell* 165, 792-800.

595 Rauch, I., Deets, K.A., Ji, D.X., von Moltke, J., Tenthorey, J.L., Lee, A.Y., Philip, N.H., Ayres, J.S.,  
596 Brodsky, I.E., Gronert, K., *et al.* (2017). NAIP-NLRC4 Inflammasomes Coordinate Intestinal Epithelial  
597 Cell Expulsion with Eicosanoid and IL-18 Release via Activation of Caspase-1 and -8. *Immunity* 46,  
598 649-659.

599 Rauch, I., Tenthorey, J.L., Nichols, R.D., Al Moussawi, K., Kang, J.J., Kang, C., Kazmierczak, B.I.,  
600 and Vance, R.E. (2016). NAIP proteins are required for cytosolic detection of specific bacterial ligands  
601 in vivo. *The Journal of experimental medicine* 213, 657-665.

602 Reyes Ruiz, V.M., Ramirez, J., Naseer, N., Palacio, N.M., Siddarthan, I.J., Yan, B.M., Boyer, M.A.,  
603 Pensinger, D.A., Sauer, J.D., and Shin, S. (2017). Broad detection of bacterial type III secretion  
604 system and flagellin proteins by the human NAIP/NLRC4 inflammasome. *Proc Natl Acad Sci U S A*  
605 114, 13242-13247.

606 Sandstrom, A., Mitchell, P.S., Goers, L., Mu, E.W., Lesser, C.F., and Vance, R.E. (2019). Functional  
607 degradation: A mechanism of NLRP1 inflammasome activation by diverse pathogen enzymes.  
608 *Science* 364.

609 Sansonetti, P.J., Phalipon, A., Arondel, J., Thirumalai, K., Banerjee, S., Akira, S., Takeda, K., and  
610 Zychlinsky, A. (2000). Caspase-1 activation of IL-1 $\beta$  and IL-18 are essential for *Shigella flexneri*-  
611 induced inflammation. *Immunity* 12, 581-590.

612 Schnupf, P., and Sansonetti, P.J. (2019). *Shigella* Pathogenesis: New Insights through Advanced  
613 Methodologies. *Microbiology spectrum* 7.

614 Schroeder, G.N., and Hilbi, H. (2008). Molecular pathogenesis of *Shigella* spp.: controlling host cell  
615 signaling, invasion, and death by type III secretion. *Clinical microbiology reviews* 21, 134-156.

616 Sellin, M.E., Muller, A.A., Felmy, B., Dolowschiak, T., Diard, M., Tardivel, A., Maslowski, K.M., and  
617 Hardt, W.D. (2014). Epithelium-intrinsic NAIP/NLRC4 inflammasome drives infected enterocyte  
618 expulsion to restrict *Salmonella* replication in the intestinal mucosa. *Cell Host Microbe* 16, 237-248.

619 Shi, J., Zhao, Y., Wang, K., Shi, X., Wang, Y., Huang, H., Zhuang, Y., Cai, T., Wang, F., and Shao, F.  
620 (2015). Cleavage of GSDMD by inflammatory caspases determines pyroptotic cell death. *Nature* 526,  
621 660-665.

622 Shim, D.H., Suzuki, T., Chang, S.Y., Park, S.M., Sansonetti, P.J., Sasakawa, C., and Kweon, M.N.  
623 (2007). New animal model of shigellosis in the Guinea pig: its usefulness for protective efficacy  
624 studies. *J Immunol* 178, 2476-2482.

625 Tenthorey, J.L., Kofoed, E.M., Daugherty, M.D., Malik, H.S., and Vance, R.E. (2014). Molecular basis  
626 for specific recognition of bacterial ligands by NAIP/NLRC4 inflammasomes. *Mol Cell* 54, 17-29.

627 Vance, R.E. (2015). The NAIP/NLRC4 inflammasomes. *Curr Opin Immunol* 32, 84-89.

628 von Moltke, J., Trinidad, N.J., Moayeri, M., Kintzer, A.F., Wang, S.B., van Rooijen, N., Brown, C.R.,  
629 Krantz, B.A., Leppla, S.H., Gronert, K., *et al.* (2012). Rapid induction of inflammatory lipid mediators  
630 by the inflammasome in vivo. *Nature* 490, 107-111.

631 Wang, H., Yang, H., Shivalila, C.S., Dawlaty, M.M., Cheng, A.W., Zhang, F., and Jaenisch, R. (2013).  
632 One-step generation of mice carrying mutations in multiple genes by CRISPR/Cas-mediated genome  
633 engineering. *Cell* 153, 910-918.

634 West, N.P., Sansonetti, P., Mounier, J., Exley, R.M., Parsot, C., Guadagnini, S., Prevost, M.C.,  
635 Prochnicka-Chalufour, A., Delepierre, M., Tanguy, M., *et al.* (2005). Optimization of virulence  
636 functions through glucosylation of *Shigella* LPS. *Science* 307, 1313-1317.

637 Yang, J., Zhao, Y., Shi, J., and Shao, F. (2013). Human NAIP and mouse NAIP1 recognize bacterial  
638 type III secretion needle protein for inflammasome activation. *Proc Natl Acad Sci U S A* 110, 14408-  
639 14413.

640 Yum, L.K., and Agaisse, H. (2019). Mechanisms of bacillary dysentery: lessons learnt from infant  
641 rabbits. *Gut microbes*, 1-6.

642 Yum, L.K., Byndloss, M.X., Feldman, S.H., and Agaisse, H. (2019). Critical role of bacterial  
643 dissemination in an infant rabbit model of bacillary dysentery. *Nat Commun* 10, 1826.

644 Zhao, Y., and Shao, F. (2015). The NAIP-NLRC4 inflammasome in innate immune detection of  
645 bacterial flagellin and type III secretion apparatus. *Immunol Rev* 265, 85-102.

646 **Acknowledgements**

647 We thank M. Goldberg for advice and for sharing the *icsA* mutant *Shigella* strain. We are grateful to G.  
648 Barton and H. Darwin for comments on the manuscript, and members of the Vance and Barton Labs  
649 for discussions. Funding: R.E.V. is an HHMI Investigator and is supported by NIH AI075039 and  
650 AI063302; P.S.M. is supported by a Jane Coffin Childs Memorial Fund postdoctoral fellowship. J.L.R.  
651 is an Irving H. Wiesenfeld CEND Fellow; E.A.T. is supported by the UC Berkeley Department of  
652 Molecular and Cell Biology NIH Training Grant 5T32GM007232-42; C.F.L. is a Brit d'Arbeloff MGH  
653 Research Scholar and supported by NIH AI064285 and NIH AI128743; I.R. is supported by the  
654 Medical Research Foundation MRF2012.

655

656 **Competing interests**

657 R.E.V. has a financial relationship with Aduro BioTech and Ventus Therapeutics and both he and the  
658 companies may benefit from the commercialization of the results of this research.

659

660 **Author contributions**

661 P.S.M, J.L.R., and R.E.V. conceived the study, designed the experiments, and wrote the original  
662 manuscript; P.S.M and J.L.R. performed the majority of the experiments with contributions from E.A.T  
663 and R.A.C.; I.R., L.G., and C.F.L. provided resources; I.R. and C.F.L. contributed to methodology and  
664 supervision; P.S.M, J.L.R., R.E.V., I.R., L.G., and C.F.L. edited and reviewed the manuscript.

665

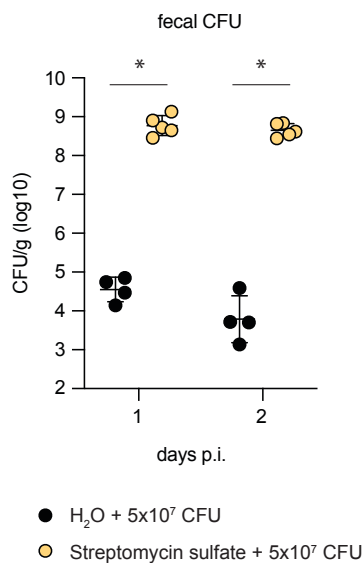

666

667

668

669

670

671

672

673

**Figure S1. Antibiotic pre-treatment followed by oral route *Shigella* infection permits substantial luminal colonization.**

CFU determination per gram (g) feces of B6 WT mice that were treated orally with 25mg streptomycin sulfate (yellow) or water (black) and orally challenged the next day with 5x10<sup>7</sup> CFU of WT *Shigella*. Feces were collected 1 and 2 days post-infection (p.i.). Data are representative of three experiments. Each symbol represents one mouse. Mann-Whitney test, \*P < 0.05.

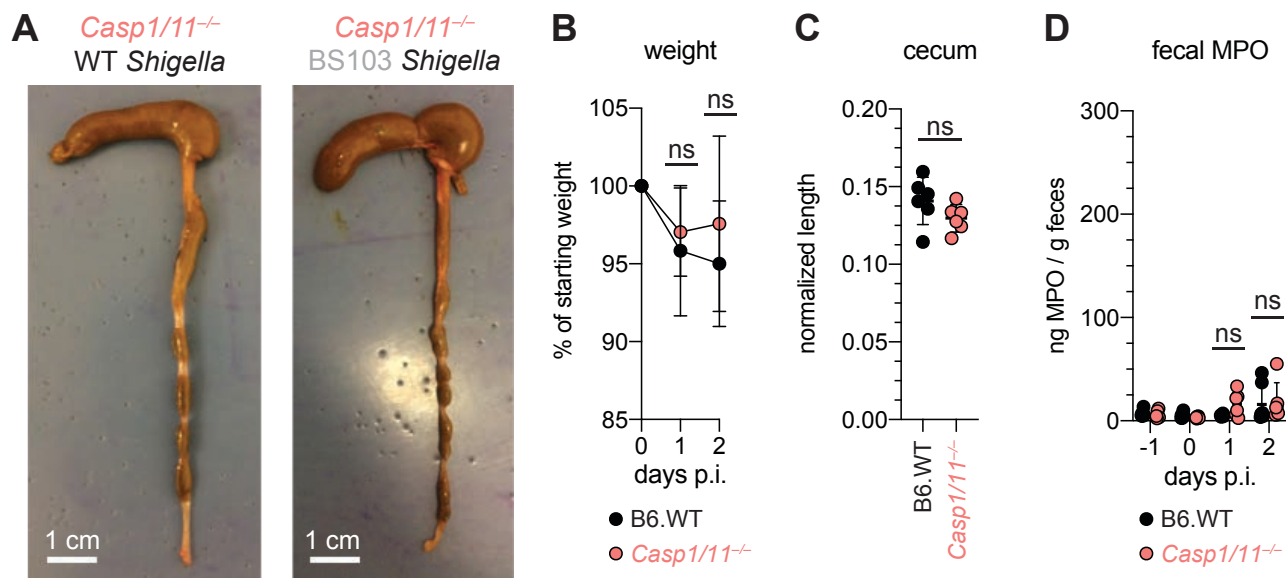

674

675

**Figure S2. B6.*Casp1/11<sup>-/-</sup>* mice are resistant to oral *Shigella* challenge.**

(A–D) B6.WT (black) and B6.*Casp1/11<sup>-/-</sup>* (peach) mice were treated orally with 25mg streptomycin sulfate and were orally challenged the next day with  $5 \times 10^7$  CFU of either WT or BS103 (avirulent) *Shigella*.

677

(A) Representative images of the cecum and colon dissected at 2 days post-infection (p.i.).

678

(B) Mouse weights.

679

(C) Quantification of cecum and colon lengths. Values were normalized to mouse weight prior to infection; cecum length (cm) / mouse weight.

680

(D) MPO levels measured by ELISA from feces of B6.WT and B6.*Casp1/11<sup>-/-</sup>* mice collected -1 through 2 days p.i.

681

Each symbol represents one mouse. Data are representative of three independent experiments. Mean  $\pm$  SD is shown in

682

(B,C,D), Mann-Whitney test, \* $P < 0.05$ .

683

684

685

686

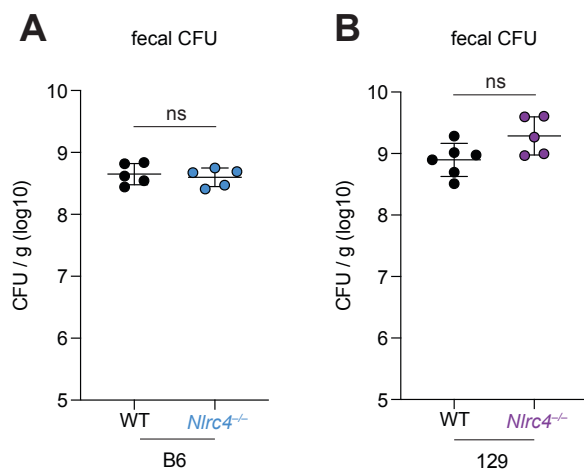

687

688

689

690

691

692

693

694

**Figure S3. Luminal colonization by *Shigella* is similar between WT and NAIP–NLRC4-deficient mice.**

(A) CFU determination per gram (g) feces from B6 and B6.*Nlrc4*<sup>-/-</sup> *Shigella*-infected mice 2 days post-infection.

(B) CFU determination per gram (g) feces from 129 and 129.*Nlrc4*<sup>-/-</sup> *Shigella*-infected mice 2 days post-infection.

Each symbol represents one mouse. Mann-Whitney test, \**P* < 0.05.

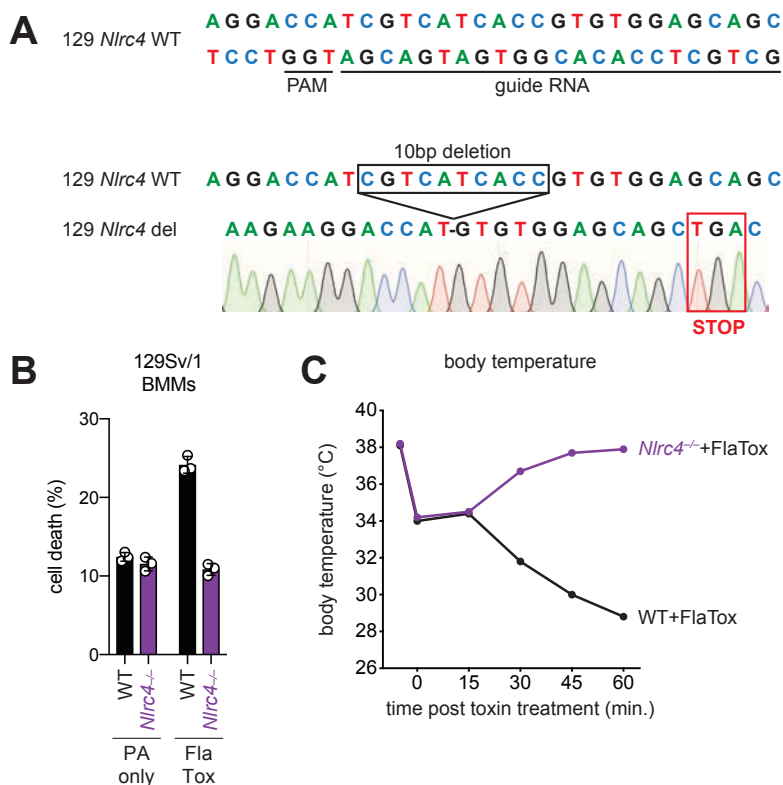

695

696

697

**Figure S4. Construction and functional characterization of *Nlrc4* knockout mice on the 129S1/SvImJ genetic background.**

698

(A) The targeted wildtype *Nlrc4* sequence (chromosome 17, NC\_000083.6, exon 5)

699

aligned to the *Nlrc4* guide RNA. The protospacer adjacent motif (PAM) is indicated. Below is a schematic of the Sanger

700

sequencing verified product of CRISPR/Cas9-editing (129 *Nlrc4* del), which results in a 10 base pair deletion and an in-frame

701

early TGA stop codon in exon 5 of *Nlrc4*.

702

(B) Quantification of cell death in 129 WT or *Nlrc4*<sup>-/-</sup> bone marrow derived macrophages (BMMs) treated with 10µg/mL PA

703

alone or PA + 10µg/mL LFn-FlaA (LFn fused to *Legionella pneumophila* flagellin, "FlaTox"). Cell death was measured 30

704

minutes post-infection by propidium iodide uptake and reported as percent death relative to 100% killing by treatment with

705

Triton X-100.

706

(C) WT or 129.*Nlrc4*<sup>-/-</sup> mice were injected intravenously with 0.2µg/g body weight PA + 0.1µg/g body weight LFn-FlaA and

707

body temperature was monitored for the indicated times (minutes) post-treatment. The initial temperature decrease in all

708

mice is due to isoflurane treatment.

709
